# Supplementary material for: Dual Labeling of Primary Cells with Fluorescent Gadolinium Oxide Nanoparticles
Source: MDPI journal article supplement (doi:10.3390/nano13121869), 2023-06-16
Supplement: s1 [file s1]

## Dual labeling of primary cells with fluorescent gadolinium oxide nanoparticles

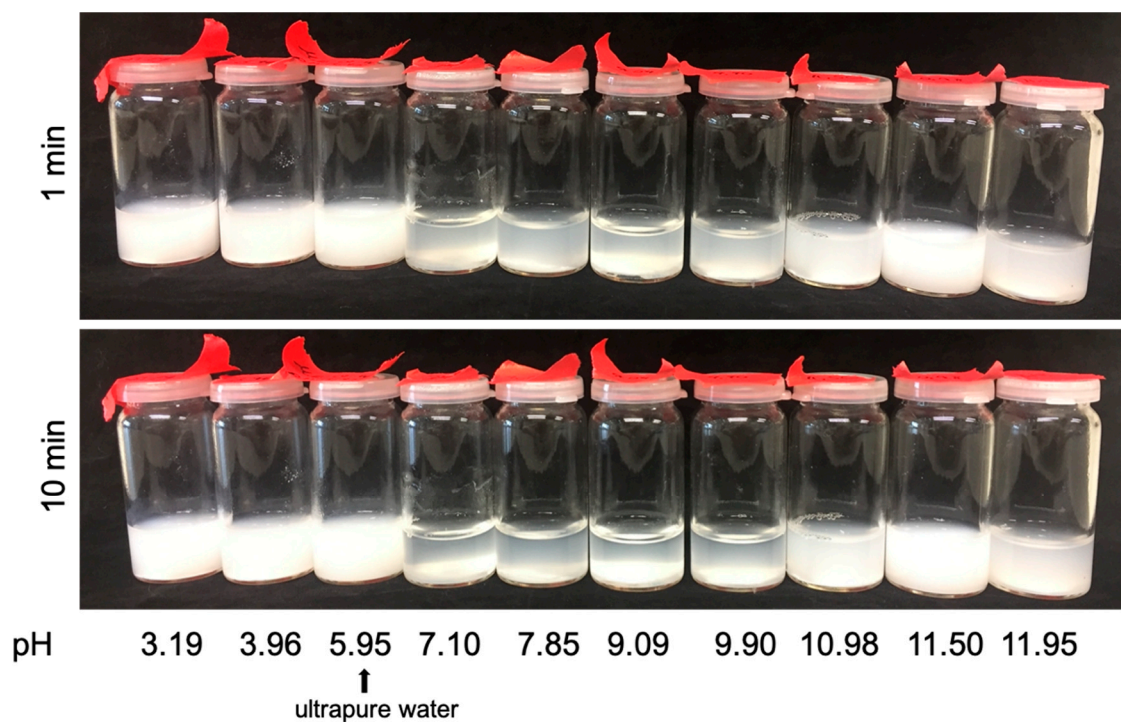

**Figure S1.**  $\text{Gd}_2\text{O}_3$  nanoparticles dispersed in pH series. The ultrapure water has a pH of 5.95. Representative images are shown for 1 min and 10 min after dispersion.

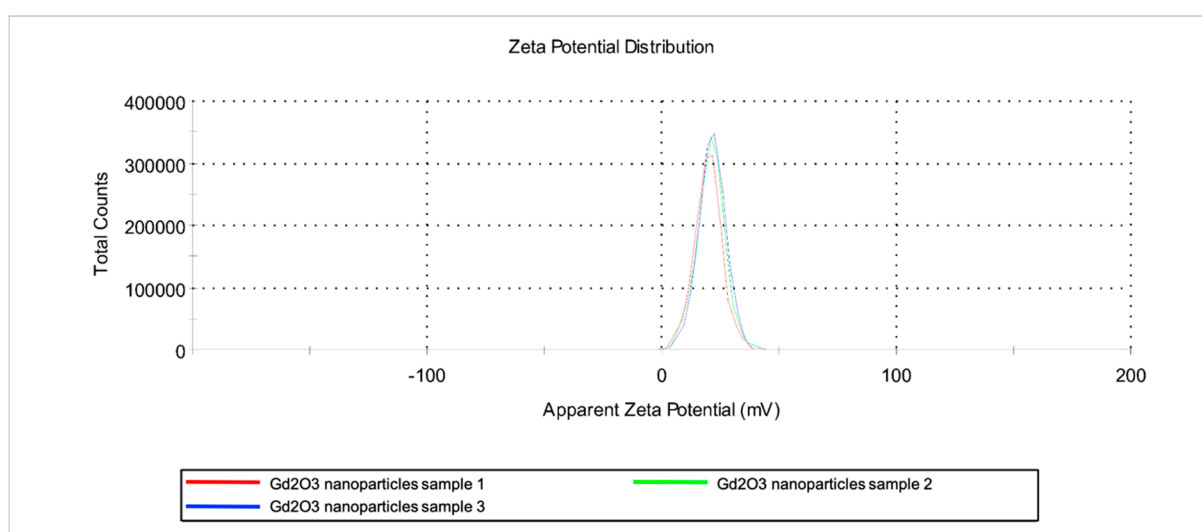

**Figure S2.** Apparent Zeta-potential in mV (x-axis) for triplicate samples of 10 mM  $\text{Gd}_2\text{O}_3$  nanoparticles in UPW consisting of averaged data from 12 runs each. Mean Zeta Potential =  $19.8 \pm 5.9$  mV.

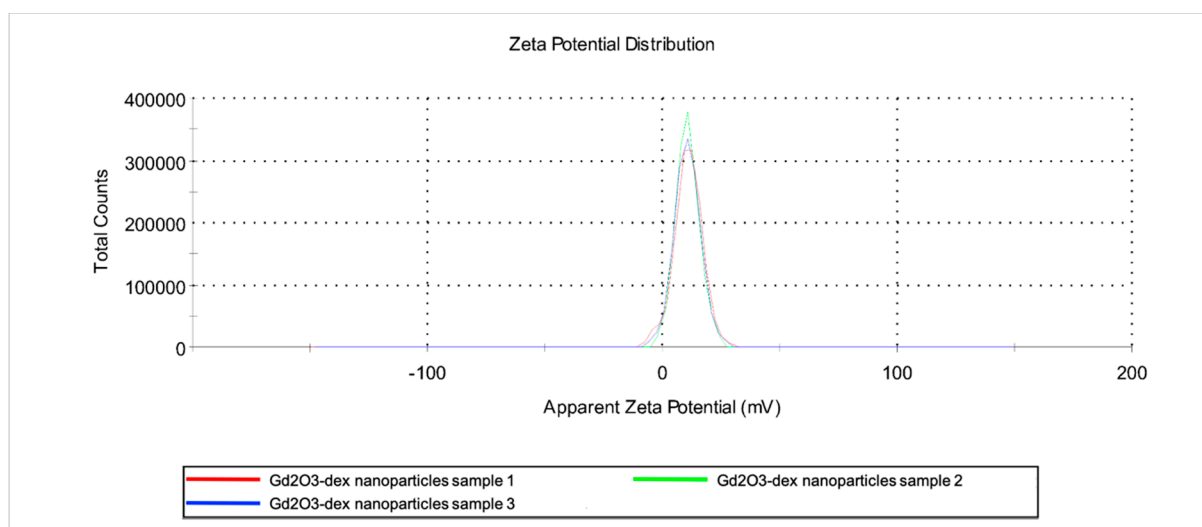

**Figure S3.** Apparent Zeta-potential in mV (x-axis) for triplicate samples of 10 mM Gd<sub>2</sub>O<sub>3</sub>-dex nanoparticles in UPW consisting of averaged data from 12 runs each. Mean Zeta Potential =  $11.1 \pm 6.0$  mV.

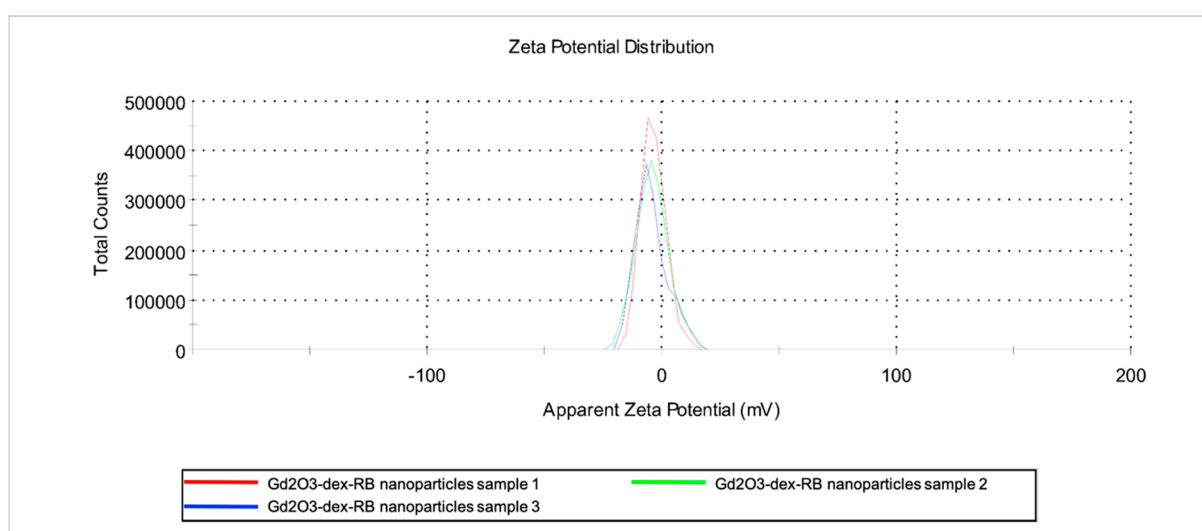

**Figure S4.** Apparent Zeta-potential in mV (x-axis) for triplicate samples of 10 mM Gd<sub>2</sub>O<sub>3</sub>-dex-RB nanoparticles in UPW consisting of averaged data from 12 runs each. Mean Zeta Potential =  $-3.52 \pm 5.45$  mV.

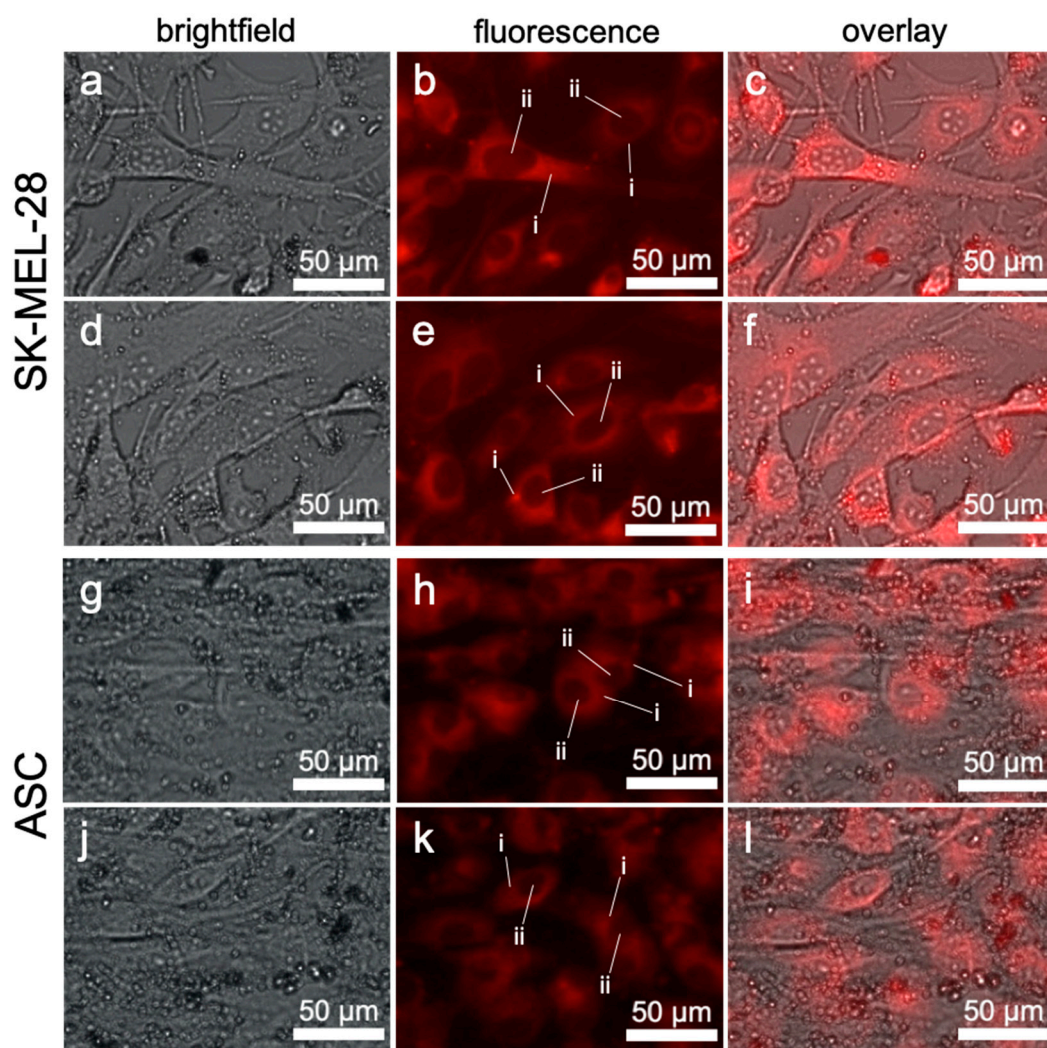

**Figure S5.** SK-MEL-28 (a-f) and ASC (g-l) incubated with 2 mM Gd<sub>2</sub>O<sub>3</sub>-dex-RB nanoparticles for 24 h, respectively. Showing bright-field (a, d, g, j), fluorescence microscopy (b, e, h, k), and overlay (c, f, i, l). Both cell lines show a bright fluorescence signal in the cytosol (i), sparing the nucleus (ii).
